# Supplementary material for: Genome-wide identification of the trehalose-6-phosphate synthase gene family in sweet orange (Citrus sinensis) and expression analysis in response to phytohormones and abiotic stresses
Source: PeerJ. 2022 Sep 9;10:e13934. doi: 10.7717/peerj.13934 (PMC9466596; doi:10.7717/peerj.13934)
Supplement: Supplemental Information 1 — Three independent biological replicates were performed, and each reaction was performed in technical triplicates. [file peerj-10-13934-s001.xlsx]

## Sheet: Sheet1
	CisTPS1	CisTPS1	CisTPS1	CisTPS2	CisTPS2	CisTPS2	CisTPS3	CisTPS3	CisTPS3	CisTPS4	CisTPS4	CisTPS4	CisTPS5	CisTPS5	CisTPS5	CisTPS6	CisTPS6	CisTPS6	CisTPS7	CisTPS7	CisTPS7	CisTPS8	CisTPS8	CisTPS8	FBOX	FBOX	FBOX
Leaf1	26.86	27.27	27.49	23.19	22.96	22.92	23.46	23.42	23.73	22.98	23.17	23.24	21.97	22.09	22.14	25.14	26.03	25.74	26.05	26.32	25.93	25.85	26.25	26.13	23.35	23.56	23.42
Leaf2	27.21	27.65	27.25	21.26	21.2	21.35	22.16	22.31	22.17	21.6	21.85	21.87	21.3	21.47	21.67	25.16	25.8	25.13	25.52	25.78	25.04	24.99	25.67	25.14	22.05	21.97	22.08
Leaf3	26.18	25.6	25.43	22.17	22.04	22.28	22.68	22.42	22.47	22.1	22.09	22.22	21.46	21.54	21.47	25.13	24.62	24.7	26.7	27	26.77	24.77	25.17	25.19	22.62	23.12	22.98
Stem1	26.61	26.33	26.23	21.89	21.66	21.86	22.11	22.08	21.67	22.01	22.15	22.13	21.03	21.38	21.3	23.3	23.06	23.04	26.83	27.3	27.6	24.59	24.25	24.1	23.34	23.29	23.17
Stem2	27.39	27.23	27.62	23.19	22.84	23.35	23.21	23.34	23.32	23.41	23.29	23.49	21.24	21.7	21.55	24.78	24.98	25.12	28.27	28.28	27.49	26.43	25.93	26.11	24.75	24.12	24.24
Stem3	27.44	27.14	27.79	22.84	22.57	22.71	22.92	22.95	22.84	22.85	22.79	23.22	21.25	21.75	21.4	24.99	24.7	25.3	27.87	28.36	28.16	27.6	27.6	27.24	24.26	24.37	24.86
Root1	27.36	27.38	27.15	20.25	20.34	20.28	20.31	20.18	20.29	20.68	20.72	20.95	20.83	21.11	21.07	23.22	23.09	23.02	25.98	26.01	25.89	22.59	24.04	24.57	22.78	22.27	22.53
Root2	27.43	27.22	27.54	19.93	20.04	20	19.8	20.03	19.78	20.72	21.12	20.85	20.73	20.77	20.8	22.17	22.04	22.24	25.55	26.03	25.79	24.11	24.06	23.98	22.36	22.31	22.35
Root3	26.44	26.49	26.29	21.73	21.86	21.69	21.99	22.04	22.04	21.92	22.24	22.19	21.37	21.63	21.73	24.25	24.62	24.24	26.23	25.99	26.08	24.8	25.2	25.03	23.8	24.02	24.18
