# Supplementary material for: Genome-wide identification of the trehalose-6-phosphate synthase gene family in sweet orange (Citrus sinensis) and expression analysis in response to phytohormones and abiotic stresses
Source: PeerJ. 2022 Sep 9;10:e13934. doi: 10.7717/peerj.13934 (PMC9466596; doi:10.7717/peerj.13934)
Supplement: Supplemental Information 2 — Three independent biological replicates were performed, and each reaction was performed in technical triplicates. [file peerj-10-13934-s002.xlsx]

## Sheet: Sheet1
ABA	CisTPS1	CisTPS1	CisTPS1	CisTPS2	CisTPS2	CisTPS2	CisTPS3	CisTPS3	CisTPS3	CisTPS4	CisTPS4	CisTPS4	CisTPS5	CisTPS5	CisTPS5	CisTPS6	CisTPS6	CisTPS6	CisTPS7	CisTPS7	CisTPS7	CisTPS8	CisTPS8	CisTPS8	FBOX	FBOX	FBOX
0 h-1	26.86	27.27	27.49	23.19	22.96	22.92	23.46	23.42	23.73	22.98	23.17	23.24	21.97	22.09	22.14	25.14	26.03	25.74	26.05	26.32	25.93	25.85	26.25	26.13	23.35	23.56	23.42
0 h-2	27.21	27.65	27.25	21.26	21.2	21.35	22.16	22.31	22.17	21.6	21.85	21.87	21.3	21.47	21.67	25.16	25.8	25.13	25.52	25.78	25.04	24.99	25.67	25.14	22.05	21.97	22.08
0 h-3	26.18	25.6	25.43	22.17	22.04	22.28	22.68	22.42	22.47	22.1	22.09	22.22	21.46	21.54	21.47	25.13	24.62	24.7	26.7	27	26.77	24.77	25.17	25.19	22.62	23.12	22.98
6 h-1	25.28	25.88	25.41	19.39	19.61	20.2	21.14	21.37	21.6	21.04	21.3	21.56	20.51	21.04	21.22	24.69	24.58	24.96	25.43	26.13	26.37	23.89	24.23	24.57	22.24	21.78	22.3
6 h-2	26.03	26.65	26.18	20.31	20.25	20.08	20.64	21.37	21.28	21.45	21.99	22.04	22.25	21.47	22.05	26.5	26.06	26.22	24.7	25.03	25.35	24.88	24.57	25.17	21.84	22.23	22.39
6 h-3	27.22	27.84	27.48	20.19	20.33	19.43	20.76	21.31	20.89	22.48	22.2	22.22	21.55	22.04	22	25.38	25.23	25.73	25.71	25.91	25.8	25.62	24.93	25.19	22.49	22.64	22.82
12 h-1	26.87	26.28	26.09	23.13	23.76	23.54	23.3	23.25	23.59	25.01	24.9	25.14	23.97	24.51	24.16	28.26	29.07	28.73	28.12	28.32	28.11	28.53	27.73	28.18	22.85	23.8	23.02
12 h-2	25.98	26.04	25.63	22.13	22.2	22.52	22.43	22.44	22.78	23.73	24.17	23.98	24	23.21	23.49	25.21	25.54	25.45	27.77	27.88	27.96	25.4	24.79	25.63	23.3	23.83	23.78
12 h-3	25.58	25.55	25.93	20.99	20.4	21.02	21.26	21.09	21.37	22.53	22.86	23.13	22.14	21.46	22.29	23.41	24.02	24.22	25.04	25.76	25.8	24.29	23.4	24.1	22.09	22.69	22.8
24 h-1	26.06	25.69	26.4	18.82	18.47	19.22	19.1	19.55	19.81	21.51	21.06	21.41	20.14	19.62	20.1	23.51	23.68	24.01	24.5	25.01	24.91	24.36	23.46	23.57	21.35	21.9	22.13
24 h-2	26.25	25.81	26.71	18.15	18.08	18.68	18.25	18.05	18.34	20.32	20.51	20.32	20.76	20.04	20.02	24.21	23.85	24.26	23.28	23.08	23.26	23.54	22.86	23.21	20.88	20.78	21.18
24 h-3	25.66	25.67	25.87	19.81	19.48	19.71	20.08	20.18	20.5	22.57	21.94	22.38	20.54	20.5	21.15	24.74	24.29	24.82	25.89	25.63	25.55	24.34	24.03	24.44	21.94	22.48	22.73
IAA	CisTPS1	CisTPS1	CisTPS1	CisTPS2	CisTPS2	CisTPS2	CisTPS3	CisTPS3	CisTPS3	CisTPS4	CisTPS4	CisTPS4	CisTPS5	CisTPS5	CisTPS5	CisTPS6	CisTPS6	CisTPS6	CisTPS7	CisTPS7	CisTPS7	CisTPS8	CisTPS8	CisTPS8	FBOX	FBOX	FBOX
0 h-1	26.86	27.27	27.49	23.19	22.96	22.92	23.46	23.42	23.73	22.98	23.17	23.24	21.97	22.09	22.14	25.14	26.03	25.74	26.05	26.32	25.93	25.85	26.25	26.13	23.35	23.56	23.42
0 h-2	27.21	27.65	27.25	21.26	21.2	21.35	22.16	22.31	22.17	21.6	21.85	21.87	21.3	21.47	21.67	25.16	25.8	25.13	25.52	25.78	25.04	24.99	25.67	25.14	22.05	21.97	22.08
0 h-3	26.18	25.6	25.43	22.17	22.04	22.28	22.68	22.42	22.47	22.1	22.09	22.22	21.46	21.54	21.47	25.13	24.62	24.7	26.7	27	26.77	24.77	25.17	25.19	22.62	23.12	22.98
6 h-1	27.3	27.76	27.83	18.97	18.63	19.05	20.22	20.59	20.14	21.42	21.6	21.58	19.69	20.12	20.1	23.67	24.24	24.22	24.93	24.78	24.31	22.05	22.37	22.56	22.25	22.17	22.47
6 h-2	25.91	26.48	26.26	19.38	19.47	19.36	21.07	21.53	21.06	22.34	22.61	22.75	21.02	20.33	20.78	24.03	23.76	24.26	24.28	24.55	24.14	21.93	22.46	22.36	22.06	22.58	22.35
6 h-3	25.9	26.09	26.4	19.84	19.37	19.81	20.66	20.25	20.86	23.11	23.12	23.28	21.01	20.83	21.22	25.02	24.6	25.25	24.92	25.57	25.55	22.62	23.09	23.38	22.38	22.44	22.35
12 h-1	26.35	26.58	26.75	19.93	19.39	19.79	20.74	20.28	20.89	22.1	21.94	22.39	21.21	20.8	21.62	26.69	26.6	26.49	23.13	23.95	23.22	23.89	23.92	24.1	21.83	22.05	22.26
12 h-2	26.44	26.24	26.82	19.77	19.59	19.25	19.97	20.24	20.14	21.41	21.41	21.96	21.25	21.1	21.3	25.33	25.39	25.33	23.65	23.8	24.64	23.22	23.32	23.56	22.34	22.26	22.48
12 h-3	28.63	28.39	28.02	19.29	19.14	19.24	21.09	20.57	21.29	22.72	22.15	22.61	20.83	21.04	21.27	24.06	24.03	24.4	24.41	24.3	24.78	23.04	22.97	22.72	23.04	22.28	22.81
24 h-1	27.03	27.13	26.53	20.54	20.66	21.18	20.89	21.11	21.41	22.84	22.71	22.68	22.01	21.98	22.09	26.19	25.77	26.35	25.33	25.61	26.12	25.03	25.57	25.29	22.29	22.73	22.52
24 h-2	27.43	27.73	27.32	19.33	19.21	18.66	20.17	19.67	19.57	21.91	21.56	21.28	21.51	21.47	21.06	24.85	25.57	25.6	24.21	24.15	24.63	22.84	22.6	23.14	21.46	21.56	22.06
24 h-3	25.54	25.34	25.06	19.13	18.97	18.65	20.32	19.92	19.97	21.92	21.3	21.42	21.73	21.55	21.03	24.18	23.92	24.13	24.77	24.23	24.46	22.29	22.32	22.94	22.11	21.76	22.23
NaCl	CisTPS1	CisTPS1	CisTPS1	CisTPS2	CisTPS2	CisTPS2	CisTPS3	CisTPS3	CisTPS3	CisTPS4	CisTPS4	CisTPS4	CisTPS5	CisTPS5	CisTPS5	CisTPS6	CisTPS6	CisTPS6	CisTPS7	CisTPS7	CisTPS7	CisTPS8	CisTPS8	CisTPS8	FBOX	FBOX	FBOX
0 h-1	26.86	27.27	27.49	23.19	22.96	22.92	23.46	23.42	23.73	22.98	23.17	23.24	21.97	22.09	22.14	25.14	26.03	25.74	26.05	26.32	25.93	25.85	26.25	26.13	23.35	23.56	23.42
0 h-2	27.21	27.65	27.25	21.26	21.2	21.35	22.16	22.31	22.17	21.6	21.85	21.87	21.3	21.47	21.67	25.16	25.8	25.13	25.52	25.78	25.04	24.99	25.67	25.14	22.05	21.97	22.08
0 h-3	26.18	25.6	25.43	22.17	22.04	22.28	22.68	22.42	22.47	22.1	22.09	22.22	21.46	21.54	21.47	25.13	24.62	24.7	26.7	27	26.77	24.77	25.17	25.19	22.62	23.12	22.98
6 h-1	26.61	25.03	24.02	18.79	19.28	19.41	19.05	20.26	19.91	20.9	21.31	21.97	20.54	20.43	20.87	26.29	26.48	26.66	23.83	24.62	24.13	22.91	22.82	22.51	21.06	21.59	21.55
6 h-2	24.18	25.48	25.39	18.46	18.64	18.3	18.29	18.42	19.82	21.26	21.49	21.48	20.09	20.12	20.25	23.76	24.24	24.41	24.48	24.53	24.55	21.7	22.2	22.9	21.76	21.08	21.7
6 h-3	26.56	24.04	24.14	18.57	17.78	19.31	18.8	19.3	20.26	21.31	21.41	22.22	20.03	20.04	20.47	23.18	23.46	24.12	24.67	24.79	25.07	23.12	23.15	23.4	21.74	21.66	21.84
12 h-1	25.9	25.87	26.05	18.04	18.14	17.18	19.21	19.03	18.12	20.66	20.29	19.15	19.92	19.04	19.06	22.96	22.39	22.23	23.77	22.54	23.39	22.61	22.27	21.99	21.08	20.22	20.66
12 h-2	24.17	25.13	24.88	19.64	19.31	20.21	21.09	20.37	21.01	22.19	22.35	22.52	21.69	21.32	22.14	28.17	27.95	28.28	24.18	24.77	24.79	24.43	24.27	24.66	22.15	22.58	23.1
12 h-3	25.87	25.3	26.32	18.41	18.9	18.9	19.2	19.17	20.03	20.72	20.41	21.07	21.49	20.33	20.69	26.23	26.02	26.49	23.07	23.12	23.87	22.89	23.19	23.46	21.47	21.4	21.55
24 h-1	24.89	25.59	25.81	21.14	21.4	21.8	21.68	21.54	21.41	24.34	24.48	23.96	22.9	22.56	22.59	25.65	25.45	26.03	27.25	27.06	26.86	24.47	23.93	24.27	23.47	23.41	23.74
24 h-2	28.4	28.01	28.16	19.21	19.02	19.37	19.68	19.55	19.86	21.91	21.53	22.14	21.4	21.14	21.61	24.16	23.76	23.5	24.53	24.95	25.06	23.54	22.72	23.26	22.34	22.53	22.54
24 h-3	27.21	26.54	27.45	21.11	21.05	21.46	21.03	21.11	21.25	24.02	23.13	23.77	22.85	22.41	22.93	25.54	25.42	26.05	26.6	26.1	26.03	25.06	25.06	25.2	24.02	23.63	24.01
PEG6000	CisTPS1	CisTPS1	CisTPS1	CisTPS2	CisTPS2	CisTPS2	CisTPS3	CisTPS3	CisTPS3	CisTPS4	CisTPS4	CisTPS4	CisTPS5	CisTPS5	CisTPS5	CisTPS6	CisTPS6	CisTPS6	CisTPS7	CisTPS7	CisTPS7	CisTPS8	CisTPS8	CisTPS8	FBOX	FBOX	FBOX
0 h-1	26.86	27.27	27.49	23.19	22.96	22.92	23.46	23.42	23.73	22.98	23.17	23.24	21.97	22.09	22.14	25.14	26.03	25.74	26.05	26.32	25.93	25.85	26.25	26.13	23.35	23.56	23.42
0 h-2	27.21	27.65	27.25	21.26	21.2	21.35	22.16	22.31	22.17	21.6	21.85	21.87	21.3	21.47	21.67	25.16	25.8	25.13	25.52	25.78	25.04	24.99	25.67	25.14	22.05	21.97	22.08
0 h-3	26.18	25.6	25.43	22.17	22.04	22.28	22.68	22.42	22.47	22.1	22.09	22.22	21.46	21.54	21.47	25.13	24.62	24.7	26.7	27	26.77	24.77	25.17	25.19	22.62	23.12	22.98
6 h-1	24.49	24.37	24.27	20.12	20.11	21.15	21.78	21.36	21.94	21.98	22.48	22.9	21.77	21.67	22.06	23.24	23.71	24.03	25.46	25.88	26.04	23.37	23.96	24.07	22.53	22.22	22.22
6 h-2	24.93	24.4	24.67	20.88	21.15	21.62	21.97	22.17	22.5	23.04	22.38	23.58	21.78	22.1	22.65	24.6	25.08	25.05	25.77	26.75	26.75	23.68	24.57	24.82	22.6	23.27	23.72
6 h-3	24.61	24.63	24.46	20.5	20.44	21.03	21.25	21	21.47	21.94	22.13	22.54	22.07	21.34	21.93	23.21	23.18	23.87	24.84	25.08	25.47	23.15	22.74	23.48	22.18	22.27	22.23
12 h-1	27.06	27.44	27.18	20.91	20.27	20.37	21.44	20.93	21.54	23.16	22.83	22.75	22.7	22	22.29	26.7	26.57	27.01	24.83	24.77	25.07	23.87	23.43	24.06	22.79	22.85	23.32
12 h-2	27.7	27.63	28.51	21.08	21.46	21.23	20.37	21.09	22.24	22.4	21.74	22.63	22.97	22.61	23.47	27.76	27.77	28.23	24.23	24.15	24.77	25.87	24.89	25.69	23.04	23.22	23.7
12 h-3	24.04	25.38	26.99	21.04	20.81	20.79	21.42	21.07	21.79	23.09	22.95	23.18	22.58	22.84	22.91	24.9	24.45	24.97	24.52	24.19	24.4	24.25	23.65	24.11	22.31	22.98	22.72
24 h-1	27.16	27.99	27.45	23.03	23.37	23.29	22.64	23.32	23.68	24.09	23.29	23.56	25.61	25.06	25.5	27.67	26.72	27.25	26.08	27.01	26.28	27.74	27.04	27.88	24.05	24.55	24.66
24 h-2	25.27	25.31	25.18	20.15	19.68	20.05	20.25	20.13	20.36	21.84	21.82	21.97	21.12	20.89	21.35	24.19	23.55	23.75	25.74	25.11	25.37	24.31	23.57	24.02	22.19	22.07	22.19
24 h-3	25.18	25.04	25.82	20.72	20.22	21.03	21.22	21.24	21.41	22.93	22.5	22.61	22.08	21.41	21.75	23.55	23.21	23.36	26.26	25.35	25.62	23.79	23.07	22.9	23.2	22.57	23.02
4 °C	CisTPS1	CisTPS1	CisTPS1	CisTPS2	CisTPS2	CisTPS2	CisTPS3	CisTPS3	CisTPS3	CisTPS4	CisTPS4	CisTPS4	CisTPS5	CisTPS5	CisTPS5	CisTPS6	CisTPS6	CisTPS6	CisTPS7	CisTPS7	CisTPS7	CisTPS8	CisTPS8	CisTPS8	FBOX	FBOX	FBOX
0 h-1	26.86	27.27	27.49	23.19	22.96	22.92	23.46	23.42	23.73	22.98	23.17	23.24	21.97	22.09	22.14	25.14	26.03	25.74	26.05	26.32	25.93	25.85	26.25	26.13	23.35	23.56	23.42
0 h-2	27.21	27.65	27.25	21.26	21.2	21.35	22.16	22.31	22.17	21.6	21.85	21.87	21.3	21.47	21.67	25.16	25.8	25.13	25.52	25.78	25.04	24.99	25.67	25.14	22.05	21.97	22.08
0 h-3	26.18	25.6	25.43	22.17	22.04	22.28	22.68	22.42	22.47	22.1	22.09	22.22	21.46	21.54	21.47	25.13	24.62	24.7	26.7	27	26.77	24.77	25.17	25.19	22.62	23.12	22.98
6 h-1	25.25	24.82	25.08	19.86	19.9	20.01	21.04	20.83	21.35	21.56	21.27	21.73	22.02	21.16	21.31	25.2	25.02	25.89	24.46	24.47	25.37	24.09	23.25	24.23	22.73	22.32	23.14
6 h-2	24.14	24.43	24.68	21.14	21.12	21.65	21.51	21.76	22.4	22.92	22.39	22.94	22.19	22.19	22.58	24.01	24.36	24.38	25.55	26.44	25.87	24.48	24.16	24.61	22.63	23.13	23.35
6 h-3	24.44	24.93	24.49	21.09	21.05	21.31	21.85	22.02	22.27	22.57	22.17	22.64	22.39	22.15	23.43	25.97	25.68	26.46	24.4	25.17	26	25.19	25.3	26.31	23.04	23.67	23.65
12 h-1	24.66	24.39	24.81	18.45	18.28	18.89	22.03	22.09	22.41	21.14	21.11	21.59	23.65	23.06	23.45	25	25.56	26.51	23.33	23.57	23.26	24.44	24.59	24.98	21.17	21.61	21.89
12 h-2	26.43	26.12	26.99	23.4	23.29	23.14	25.14	25.52	25.87	25.34	25.29	25.54	24.47	24.8	25.16	28.07	27.95	28.11	27.2	27.97	28.61	28.05	27.82	28.3	26.53	27.09	27.07
12 h-3	27.04	27.21	27.21	23.36	23.25	23.71	25.97	25.24	26.18	25.15	25.95	25.34	26.08	25.55	26.4	26.5	27.64	27.24	26.23	28.96	28.37	28.51	28.12	28.36	26.27	26.27	26.75
24 h-1	25.2	25.1	25.53	20.4	20.02	19.97	21.44	21.38	21.04	22.28	22.33	22.44	21.91	21.74	22.02	26.65	26.36	27.06	24.62	24.72	24.87	24.35	24.69	25.13	23.52	23.5	23.72
24 h-2	25.57	25.89	26.02	18.22	18.04	18.28	20.06	19.48	19.84	20.89	20.46	20.62	21.1	20.71	21.04	25.49	26.12	26.04	24.2	23.03	23.39	23.58	23.65	23.78	21.83	21.82	22.07
24 h-3	26.03	25.21	25.45	18.8	18.16	18.74	20.2	19.67	20.12	20.3	20.5	20.78	21.87	21.47	21.46	25.88	25.65	25.02	23.57	23.48	23.89	23.04	23.68	23.97	22.18	22.22	22.56
40 °C	CisTPS1	CisTPS1	CisTPS1	CisTPS2	CisTPS2	CisTPS2	CisTPS3	CisTPS3	CisTPS3	CisTPS4	CisTPS4	CisTPS4	CisTPS5	CisTPS5	CisTPS5	CisTPS6	CisTPS6	CisTPS6	CisTPS7	CisTPS7	CisTPS7	CisTPS8	CisTPS8	CisTPS8	FBOX	FBOX	FBOX
0 h-1	26.86	27.27	27.49	23.19	22.96	22.92	23.46	23.42	23.73	22.98	23.17	23.24	21.97	22.09	22.14	25.14	26.03	25.74	26.05	26.32	25.93	25.85	26.25	26.13	23.35	23.56	23.42
0 h-2	27.21	27.65	27.25	21.26	21.2	21.35	22.16	22.31	22.17	21.6	21.85	21.87	21.3	21.47	21.67	25.16	25.8	25.13	25.52	25.78	25.04	24.99	25.67	25.14	22.05	21.97	22.08
0 h-3	26.18	25.6	25.43	22.17	22.04	22.28	22.68	22.42	22.47	22.1	22.09	22.22	21.46	21.54	21.47	25.13	24.62	24.7	26.7	27	26.77	24.77	25.17	25.19	22.62	23.12	22.98
6 h-1	26.16	26.73	26.63	21.95	22.21	22.05	22.07	22.72	23.24	23.29	22.54	23.22	24.19	23.69	24.08	24.79	24.5	25.05	27.07	26.9	26.5	25.44	25.1	25.96	23.44	23.44	24.23
6 h-2	25.76	25.78	25.69	20.68	21.18	21.08	20.5	19.29	21.77	22.92	22.08	22.56	22.53	22.51	22.58	21.39	21.06	21.52	26.15	26.3	26.48	23.26	23.06	23.89	23.29	23.06	23.31
6 h-3	26.96	26.12	26.78	20.78	21.01	21.17	21.87	21.14	22.46	22.39	21.99	22.83	23.33	22.79	23.15	23.27	22.46	23.5	25.01	25.49	25.09	23.95	23.44	24.18	23.16	22.65	23.22
12 h-1	25.78	26.22	26.05	21.71	22.12	22.37	21.52	21.7	21.35	24	24.07	24.54	23.9	23.77	23.92	24.15	24.62	25.22	26.27	26.61	26.37	25.67	25.42	25.8	23.35	23.94	23.93
12 h-2	27.32	27.66	28.18	22.11	22.83	22.65	20.69	20.9	20.44	26.7	26.07	26.22	23.41	24.3	24.39	24.21	24.83	25.28	28.29	28.18	28.11	27.11	27.36	28.14	25.35	25.88	25.45
12 h-3	26.91	27.19	27.23	21.21	21.14	21.29	21.37	21.21	21.39	22.7	23.37	23.46	23.17	23.52	23.2	22	22.57	21.53	27.86	28.36	28.34	25.67	25.83	26.28	24.22	24.36	24.56
24 h-1	24.12	23.46	23.44	18.62	18.03	18.27	19.4	18.98	19.14	22.12	21.51	21.62	19.66	19.4	19.62	19.64	19.42	19.92	25.09	24.71	25.37	21.51	21.55	21.64	21.67	21.75	22.28
24 h-2	23.5	23.63	23.73	19.17	18.34	18.94	20.01	19.92	19.89	21.69	21.25	21.58	20.76	20.3	20.4	21.08	21.18	21.07	25.56	25.14	25.79	21.6	22.26	22.56	22.23	22.28	22.51
24 h-3	23.75	23.73	23.09	19.26	19.07	19.14	20.24	19.87	20.13	19.65	20.06	20.32	21.95	21.84	22.29	22.07	22.27	22.27	24.62	24.01	24.45	23.47	24.01	24.38	21.41	22.07	21.99
CK	CisTPS1	CisTPS1	CisTPS1	CisTPS2	CisTPS2	CisTPS2	CisTPS3	CisTPS3	CisTPS3	CisTPS4	CisTPS4	CisTPS4	CisTPS5	CisTPS5	CisTPS5	CisTPS6	CisTPS6	CisTPS6	CisTPS7	CisTPS7	CisTPS7	CisTPS8	CisTPS8	CisTPS8	FBOX	FBOX	FBOX
0 h-1	26.86	27.27	27.49	23.19	22.96	22.92	23.46	23.42	23.73	22.98	23.17	23.24	21.97	22.09	22.14	25.14	26.03	25.74	26.05	26.32	25.93	25.85	26.25	26.13	23.35	23.56	23.42
0 h-2	27.21	27.65	27.25	21.26	21.2	21.35	22.16	22.31	22.17	21.6	21.85	21.87	21.3	21.47	21.67	25.16	25.8	25.13	25.52	25.78	25.04	24.99	25.67	25.14	22.05	21.97	22.08
0 h-3	26.18	25.6	25.43	22.17	22.04	22.28	22.68	22.42	22.47	22.1	22.09	22.22	21.46	21.54	21.47	25.13	24.62	24.7	26.7	27	26.77	24.77	25.17	25.19	22.62	23.12	22.98
6 h-1	26.1	26.47	26.47	20.77	20.98	20.72	21.3	21.56	21.62	23.29	23.17	23.08	21.33	21.56	21.43	25.43	25.95	25.44	26.89	26.92	26.48	25.19	25.07	25.07	22.24	22.48	22.21
6 h-2	27.25	27.15	27.19	19.85	19.6	19.78	20.63	20.8	20.69	22.23	22.37	22.33	20.68	20	20.09	24.81	24.39	24.33	26.3	26.85	26.06	23.83	24.04	24.29	22.45	22.66	22.47
6 h-3	26.74	26.5	26.4	21.56	21.23	21.19	22.37	22.55	22.42	23.59	23.46	23.39	21.99	22.37	22.13	25.6	25.42	25.97	26.95	27.43	27.33	24.09	24.47	24.06	23.57	23.23	23.14
12 h-1	27.21	27.13	26.87	20.83	20.9	21.02	21.37	21.21	21.35	22.26	21.98	22.58	21	21.2	21.31	25.77	25.99	25.98	25.1	25.78	24.97	24.16	24.14	24.06	22.66	22.3	22.43
12 h-2	27.28	27.26	26.92	21.59	21.49	21.53	22.41	22.3	22.5	23.28	23.25	23.31	21.34	21.59	21.75	27.41	27.38	27.36	26.88	27.47	26.93	25.52	25.04	25.04	23.58	23.44	23.41
12 h-3	27.13	27.55	27.34	21.71	21.8	21.63	22.53	22.63	22.59	22.39	22.31	22.56	21.62	22.03	22.2	26.35	26.59	26.6	25.52	26.02	25.75	26.29	26.12	26.4	23.14	23.19	23.05
24 h-1	26.86	27.3	27.89	18.75	19.13	19.48	20.44	20.38	20.36	21.64	21.47	21.82	21.16	21.11	21.22	22.28	22.55	22.91	24.18	24.65	24.84	22.85	23.11	23.32	22.24	22.04	22.32
24 h-2	26.34	26.32	26.88	20.21	20.53	20.56	22.03	22.02	22.1	22.04	22.54	22.71	22.38	21.83	21.97	24.87	25.06	25.4	25.75	26.26	26.41	24.6	25.01	24.71	23.13	23.24	23.26
24 h-3	25.7	25.5	25.92	21.06	21.07	21.29	22.19	21.51	21.81	22.15	22.6	22.84	21.55	21.37	21.22	25.36	25.7	25.38	26.1	25.54	26.2	24.84	24.58	25.1	23.45	23.77	23.69
处理	TPS1			TPS2			TPS3			TPS4			TPS5			TPS6			TPS7			TPS8			FBOX
